# Supplementary material for: Using the Neandertal genome to study the evolution of small insertions and deletions in modern humans
Source: PubMed Central journal article supplement (PMC5543596; doi:10.1186/s12862-017-1018-8), 2017-08-04
Supplement: 12862_2017_1018_MOESM1_ESM.pdf [file 12862_2017_1018_MOESM1_ESM.pdf]

# **Using the Neandertal genome to study the evolution of small insertions and deletions in modern humans**

Manjusha Chintalapati, Michael Dannemann, Kay Prüfer

**Additional File 1 with Tables S1-S7 and Figures S1-S4.**

| Chr | Position  | Ref   | alt | Type | Consequence | Gene          | c-score |
|-----|-----------|-------|-----|------|-------------|---------------|---------|
| 7   | 115542344 | TAGAG | T   | Del  | Intergenic  | NA            | 22.1    |
| 3   | 25739437  | C     | CA  | Ins  | Intergenic  | NA            | 22.1    |
| 2   | 221679644 | TAATC | T   | Del  | Intergenic  | NA            | 21.9    |
| 7   | 156283580 | CA    | C   | Del  | Intronic    | LINC01006     | 21.4    |
| 2   | 160083677 | AGAGT | A   | Del  | Intronic    | TANC1         | 21.3    |
| 9   | 119310385 | CTGTT | C   | Del  | Intronic    | RP11-264C15.2 | 21.1    |
| 9   | 119310385 | CTGTT | C   | Del  | Intronic    | ASTN2         | 21.1    |
| 9   | 37265129  | C     | CT  | Ins  | Intronic    | ZCCHC7        | 21.0    |
| 8   | 65910625  | ATAGT | A   | Del  | Intergenic  | NA            | 20.7    |
| 12  | 122590799 | TTC   | T   | Del  | Intronic    | MLXIP         | 20.6    |
| 2   | 168891430 | C     | CA  | Ins  | Intronic    | STK39         | 20.2    |
| 2   | 144225349 | CTT   | C   | Del  | Intronic    | RP11-570L15.2 | 20.2    |
| 2   | 144225349 | CTT   | C   | Del  | Intronic    | ARHGAP15      | 20.2    |
| 2   | 144225349 | CTT   | C   | Del  | Intronic    | AC096558.1    | 20.2    |
| 20  | 40295358  | CA    | C   | Del  | Intergenic  | NA            | 20.2    |
| 20  | 38267544  | GC    | G   | Del  | Intergenic  | NA            | 20.2    |
| 11  | 117229118 | AAT   | A   | Del  | Intronic    | CEP164        | 20.1    |
| 1   | 108038937 | G     | GC  | Ins  | Intergenic  | NA            | 20.1    |

**Table S1: Top 1% c-score fixed modern human indels.**

| Chr | Positions | Ref   | Alt   | Type | Consequence | Gene         | C-score | EAS_AF | EUR_AF |
|-----|-----------|-------|-------|------|-------------|--------------|---------|--------|--------|
| 14  | 74060511  | T     | TTCAA | Ins  | Frame_shift | ACOT4        | 34      | 0      | 0.006  |
| 22  | 23011159  | AG    | A     | Del  | Frame_shift | IGLV3-27     | 24.8    | 0.0139 | 0      |
| 6   | 146185477 | T     | TA    | Ins  | Frame_shift | SHPRH        | 24.3    | 0.0516 | 0      |
| 2   | 236693080 | CTAAT | C     | Del  | Upstream    | AC064874.1   | 22.9    | 0.0149 | 0      |
| 10  | 27687534  | C     | CT    | Ins  | Frame_shift | PTCHD3       | 22.9    | 0.2242 | 0.0119 |
| 7   | 21068784  | T     | TG    | Ins  | Intergenic  | NA           | 22.8    | 0      | 0.0099 |
| 22  | 24313530  | GGA   | G     | Del  | Frame_shift | DDTL         | 22.7    | 0.0278 | 0.002  |
| 4   | 151508852 | CA    | C     | Del  | Downstream  | MAB21L2      | 22.6    | 0      | 0.004  |
| 2   | 179301055 | CAG   | C     | Del  | Intronic    | PRKRA        | 22.6    | 0.1538 | 0.0249 |
| 2   | 177503917 | C     | CT    | Ins  | Upstream    | LINC01116    | 22.6    | 0.004  | 0      |
| 2   | 177503917 | C     | CT    | Ins  | Intronic    | LINC01117    | 22.6    | 0.004  | 0      |
| 16  | 28915046  | C     | CTT   | Ins  | Downstream  | RABEP2       | 22.3    | 0.0109 | 0      |
| 4   | 117649011 | CT    | C     | Del  | Intergenic  | NA           | 22.2    | 0      | 0.0388 |
| 13  | 72876666  | CA    | C     | Del  | Intergenic  | NA           | 22.2    | 0      | 0.0159 |
| 1   | 209738399 | TG    | T     | Del  | Intronic    | RP1-272L16.1 | 22.2    | 0.245  | 0.0119 |
| 9   | 98096123  | TAA   | T     | Del  | Intergenic  | NA           | 22.1    | 0.0446 | 0      |
| 3   | 184071131 | C     | CCGG  | Ins  | Inframe     | CLCN2        | 22.1    | 0      | 0.0229 |
| 14  | 99742823  | TTA   | T     | Del  | Upstream    | BCL11B       | 22.1    | 0.0139 | 0      |
| 1   | 205293177 | TAAAC | T     | Del  | Upstream    | NUAK2        | 22.0    | 0.002  | 0.008  |

|    |           |        |     |     |            |               |      |        |        |
|----|-----------|--------|-----|-----|------------|---------------|------|--------|--------|
| 12 | 102125452 | TATAAA | T   | Del | Downstream | CHPT1         | 21.9 | 0.2917 | 0.008  |
| 11 | 44026804  | AC     | A   | Del | Downstream | RP11-613D13.4 | 21.9 | 0.0288 | 0.001  |
| 6  | 69910260  | TA     | T   | Del | Intronic   | BAI3          | 21.8 | 0      | 0.001  |
| 14 | 99240729  | GT     | G   | Del | Intergenic | NA            | 21.8 | 0.1716 | 0.0388 |
| 14 | 66722909  | ATAAT  | A   | Del | Intronic   | RP11-72M17.1  | 21.8 | 0      | 0.0189 |
| 8  | 4762649   | TA     | T   | Del | Intronic   | CSMD1         | 21.7 | 0.0437 | 0      |
| 14 | 65936081  | ATAG   | A   | Del | Upstream   | RPL21P8       | 21.7 | 0.0873 | 0.003  |
| 8  | 107927163 | AAC    | A   | Del | Intergenic | NA            | 21.6 | 0      | 0.003  |
| 5  | 175215413 | TG     | T   | Del | Intergenic | NA            | 21.6 | 0      | 0.008  |
| 5  | 58519627  | CCAAT  | C   | Del | Intronic   | PDE4D         | 21.4 | 0.0536 | 0.004  |
| 5  | 117827264 | TTTAA  | T   | Del | Intronic   | CTD-2281M20.1 | 21.4 | 0.0883 | 0.003  |
| 18 | 75697997  | CA     | C   | Del | Upstream   | LINC01029     | 21.4 | 0.0625 | 0.0249 |
| 1  | 46966402  | TA     | T   | Del | Intergenic | NA            | 21.4 | 0.0536 | 0      |
| 1  | 14020411  | C      | CAG | Ins | Downstream | SCARNA11      | 21.4 | 0.0218 | 0.0209 |
| 11 | 94667080  | CAAG   | C   | Del | Intergenic | NA            | 21.3 | 0      | 0.0149 |
| 5  | 52608156  | C      | CT  | Ins | Intergenic | NA            | 21.2 | 0.0645 | 0      |
| 1  | 83216710  | TTAAG  | T   | Del | Intergenic | NA            | 21.2 | 0.0308 | 0      |
| 17 | 37815323  | TGAA   | T   | Del | Inframe    | STARD3        | 21.2 | 0      | 0.003  |
| 1  | 218868860 | AGTTT  | A   | Del | Intergenic | NA            | 21.2 | 0.005  | 0.0666 |
| 2  | 223154225 | T      | TG  | Ins | Intronic   | PAX3          | 21.1 | 0.001  | 0.001  |
| 16 | 79076425  | TACTC  | T   | Del | Intronic   | WWOX          | 21.1 | 0.001  | 0.0497 |
| 5  | 154878448 | CAAT   | C   | Del | Intergenic | NA            | 21.0 | 0.0466 | 0      |
| 3  | 169381200 | C      | CT  | Ins | Regulatory | NA            | 21.0 | 0.0774 | 0.002  |

**Table S2: Top 1% c-score introgressed indels**

| <b>Component</b>   | <b>Category</b>                   | <b>Gene ontology</b> | <b>Genes in Modern human specific</b> | <b>Genes in Shared with Neandertals</b> | <b>FWER_Modern_human</b> | <b>FWER_Shared</b> |
|--------------------|-----------------------------------|----------------------|---------------------------------------|-----------------------------------------|--------------------------|--------------------|
| cellular_component | ion channel complex               | GO:0034702           | 15748                                 | 7377                                    | 0.005                    | 1                  |
| cellular_component | transmembrane transporter complex | GO:1902495           | 16123                                 | 7559                                    | 0.005                    | 1                  |

**Table S3: Gene Ontology categories with enrichment for modern human specific changes.**

| Chr | Position  | Ancestral | Derived | Type | Annotation | Gene         | C-score | F <sub>st</sub> | EAS_AF | EUR_AF |
|-----|-----------|-----------|---------|------|------------|--------------|---------|-----------------|--------|--------|
| 11  | 120175419 | TAGAAA    | T       | Del  | Regulatory | NA           | 17.71   | 0.599           | 0.6032 | 0.002  |
| 12  | 102374341 | T         | TAG     | Ins  | Intronic   | DRAM1        | 11.54   | 0.42404         | 0.4554 | 0.0149 |
| 1   | 209986054 | GTGAC     | G       | Del  | Intergenic | NA           | 10.82   | 0.39851         | 0.4286 | 0.0139 |
| 1   | 215924632 | CAGT      | C       | Del  | Intronic   | USH2A        | 11.57   | 0.3787          | 0.3968 | 0.008  |
| 14  | 58320402  | TA        | T       | Del  | Intronic   | SLC35F4      | 16.76   | 0.36089         | 0.3919 | 0.0139 |
| 7   | 13620958  | CT        | C       | Del  | Intronic   | AC011288.2   | 12.06   | 0.34519         | 0.001  | 0.3479 |
| 12  | 114745134 | TA        | T       | Del  | Intergenic | NA           | 12.74   | 0.30133         | 0.3482 | 0.0209 |
| 3   | 169313681 | GA        | G       | Del  | Intronic   | MECOM        | 10.53   | 0.28547         | 0.2887 | 0.001  |
| 2   | 169866296 | ACT       | A       | Del  | Intronic   | ABCB11       | 15.80   | 0.2778          | 0.2788 | 0      |
| 12  | 102125452 | TATAAA    | T       | Del  | Downstream | CHPT1        | 21.9    | 0.272           | 0.2917 | 0.008  |
| 12  | 102622272 | CT        | C       | Del  | Downstream | RP11-18O15.1 | 10.18   | 0.26756         | 0.3006 | 0.0139 |
| 16  | 72814910  | G         | GT      | Ins  | Downstream | ZFH3         | 12.19   | 0.25482         | 0.2679 | 0.005  |
| 6   | 131324263 | TA        | T       | Del  | Intronic   | EPB41L2      | 13.38   | 0.25264         | 0.2609 | 0.003  |
| 10  | 27845466  | CAG       | C       | Del  | Intergenic | NA           | 10.66   | 0.23812         | 0.2629 | 0.0099 |
| 6   | 131069041 | AAAG      | A       | Del  | Intergenic | NA           | 14.48   | 0.23294         | 0.2688 | 0.0149 |
| 5   | 36203135  | AAGAG     | A       | Del  | Regulatory | NA           | 15.35   | 0.22423         | 0.2252 | 0      |
| 5   | 36194785  | TTCTC     | T       | Del  | 3prime_utr | NADK2        | 11.07   | 0.22423         | 0.2252 | 0      |
| 5   | 36193223  | CAG       | C       | Del  | Downstream | NADK2        | 20.3    | 0.22423         | 0.2252 | 0      |
| 1   | 209738399 | TG        | T       | Del  | Intronic   | RP1-272L16.1 | 22.2    | 0.21545         | 0.245  | 0.0119 |
| 12  | 125147092 | ATGGCC    | A       | Del  | Intergenic | NA           | 10.11   | 0.20072         | 0.3145 | 0.0547 |

**Table S4: Introgressed indels with F<sub>st</sub> between Europeans and East Asians above 0.15 and c-score above 10.**

| Category     | Utr  | Downstream | Coding_Region | Intergenic | Intron | Non_Coding_Transcript_Exon | Regulatory_Region | Splice | Upstream |
|--------------|------|------------|---------------|------------|--------|----------------------------|-------------------|--------|----------|
| Shared       | 2.3  | 3.4        | 0.118         | 31.189     | 55.68  | 1.497                      | 1.739             | 0.1912 | 3.86     |
| Modern       | 2.61 | 3.5        | 0.309         | 30.324     | 55.89  | 1.59                       | 1.75              | 0.2007 | 3.849    |
| Introgressed | 2.46 | 3.4        | 0.209         | 31.51      | 55.3   | 1.57                       | 1.55              | 0.176  | 3.818    |

**Table S5: Percentage of indels annotated using VEP for Neandertal-shared indels, modern human specific indels and introgressed indels.**

| Category                    | Shared | Modern Human specific |
|-----------------------------|--------|-----------------------|
| Deletions                   | 199041 | 604423                |
| Insertions                  | 152840 | 266969                |
| Ratio(Deletions/Insertions) | 1.30   | 2.26                  |

**Table S6A: Counts of insertions to deletions compared between modern human specific and Neandertal shared indels. Introgressed indels were removed from the counts of Neandertal-shared indels. The ratios differ significantly (Fisher's exact test  $p < 2.2e-16$ , odds ratio=0.58)**

| Category   | Before filtering introgressed indels from Neandertal-shared |            |          | After Filtering introgressed indels from Neandertal-shared |            |          |
|------------|-------------------------------------------------------------|------------|----------|------------------------------------------------------------|------------|----------|
|            | p-value                                                     | Odds ratio | FDR      | P-value                                                    | Odds ratio | FDR      |
| Intergenic | 1.77e-21                                                    | 0.9599     | 9.57e-21 | 3.01e-21                                                   | 0.96020    | 3.22e-20 |
| Intronic   | 0.0369                                                      | 1.0087     | 0.083    | 0.0233                                                     | 1.008044   | 0.100849 |

**Table S6B: Proportion of Neandertal-shared vs modern human specific indels in intergenic and intronic regions before and after filtering introgressed indels.**

| Human Allele              | Non-Human Allele                                                 | count   |
|---------------------------|------------------------------------------------------------------|---------|
| <b>7 primates differ</b>  |                                                                  |         |
| Hg19                      | chimpanzee, bonobo, gorilla, orangutan, gibbon, rhesus, marmoset | 336,559 |
| <b>6 primates differ</b>  |                                                                  |         |
| Hg19, gorilla             | chimpanzee, bonobo, orangutan, gibbon, rhesus, marmoset          | 12932   |
| Hg19, marmoset            | chimpanzee, bonobo, gorilla, orangutan, gibbon, rhesus           | 9797    |
| Hg19, rhesus              | chimpanzee, bonobo, gorilla, orangutan, gibbon, marmoset         | 5253    |
| Hg19, gibbon              | chimpanzee, bonobo, gorilla, orangutan, rhesus, marmoset         | 4017    |
| Hg19, orangutan           | chimpanzee, bonobo, gorilla, gibbon, rhesus, marmoset            | 3829    |
| Hg19, bonobo              | chimpanzee, gorilla, orangutan, gibbon, rhesus, marmoset         | 3292    |
| Hg19, chimpanzee          | bonobo, gorilla, orangutan, gibbon, rhesus, marmoset             | 3710    |
| <b>5 primates differ</b>  |                                                                  |         |
| Hg19, chimpanzee, bonobo  | gorilla, orangutan, gibbon, rhesus, marmoset                     | 84442   |
| Hg19, rhesus, marmoset    | chimpanzee, bonobo, gorilla, orangutan, gibbon                   | 2100    |
| Hg19, chimpanzee, gorilla | bonobo, orangutan, gibbon, rhesus, marmoset                      | 2048    |
| Hg19, gorilla, marmoset   | chimpanzee, bonobo, orangutan, gibbon, rhesus                    | 1117    |
| Hg19, gorilla, orangutan  | chimpanzee, bonobo, gibbon, rhesus, marmoset                     | 1115    |
| Hg19, gibbon, marmoset    | chimpanzee, bonobo, gorilla, orangutan, rhesus                   | 975     |
| Hg19, bonobo, gorilla     | chimpanzee, orangutan, gibbon, rhesus, marmoset                  | 953     |

|                                                        |                                                  |        |
|--------------------------------------------------------|--------------------------------------------------|--------|
| Hg19, gorilla, gibbon                                  | chimpanzee, bonobo, orangutan, rhesus, marmoset  | 835    |
| Hg19, orangutan, marmoset                              | chimpanzee, bonobo, gorilla, gibbon, rhesus      | 802    |
| Hg19, orangutan, gibbon                                | chimpanzee, bonobo, gorilla, rhesus, marmoset    | 795    |
| Hg19, gibbon, rhesus                                   | chimpanzee, bonobo, gorilla, orangutan, marmoset | 727    |
| Hg19, gorilla, rhesus                                  | chimpanzee, bonobo, orangutan, gibbon, marmoset  | 705    |
| Hg19, orangutan, rhesus                                | chimpanzee, bonobo, gorilla, gibbon, marmoset    | 634    |
| Hg19, chimpanzee, marmoset                             | bonobo, gorilla, orangutan, gibbon, rhesus       | 352    |
| Hg19, bonobo, marmoset                                 | chimpanzee, gorilla, orangutan, gibbon, rhesus   | 349    |
| Hg19, chimpanzee, gibbon                               | bonobo, gorilla, orangutan, rhesus, marmoset     | 285    |
| Hg19, chimpanzee, orangutan                            | bonobo, gorilla, gibbon, rhesus, marmoset        | 279    |
| Hg19, chimpanzee, rhesus                               | bonobo, gorilla, orangutan, gibbon, marmoset     | 219    |
| Hg19, bonobo, rhesus                                   | chimpanzee, gorilla, orangutan, gibbon, marmoset | 206    |
| Hg19, bonobo, gibbon                                   | chimpanzee, gorilla, orangutan, rhesus, marmoset | 199    |
| Hg19, bonobo, orangutan                                | chimpanzee, gorilla, gibbon, rhesus, marmoset    | 178    |
| <b>4 primates differ</b>                               |                                                  |        |
| Hg19, chimpanzee, bonobo, gorilla                      | orangutan, gibbon, rhesus, marmoset              | 371776 |
| Hg19, gorilla, orangutan, gibbon                       | chimpanzee, bonobo, rhesus, marmoset             | 1952   |
| Hg19, gibbon, rhesus, marmoset                         | chimpanzee, bonobo, gorilla, orangutan           | 1123   |
| Hg19, orangutan, gibbon, rhesus                        | chimpanzee, bonobo, gorilla, marmoset            | 1085   |
| Hg19, chimpanzee, gorilla, orangutan                   | bonobo, gibbon, rhesus, marmoset                 | 869    |
| Hg19, orangutan, rhesus, marmoset                      | chimpanzee, bonobo, gorilla, gibbon              | 818    |
| Hg19, gorilla, rhesus, marmoset                        | chimpanzee, bonobo, orangutan, gibbon            | 771    |
| Hg19, gorilla, gibbon, rhesus                          | chimpanzee, bonobo, orangutan, marmoset          | 744    |
| Hg19, bonobo, gorilla, orangutan                       | chimpanzee, gibbon, rhesus, marmoset             | 270    |
| Hg19, chimpanzee, orangutan, gibbon                    | bonobo, gorilla, rhesus, marmoset                | 227    |
| Hg19, bonobo, rhesus, marmoset                         | chimpanzee, gorilla, orangutan, gibbon           | 218    |
| Hg19, chimpanzee, rhesus, marmoset                     | bonobo, gorilla, orangutan, rhesus               | 198    |
| Hg19, chimpanzee, gibbon, rhesus                       | bonobo, gorilla, orangutan, marmoset             | 121    |
| Hg19, bonobo, orangutan, gibbon                        | chimpanzee, gorilla, rhesus, marmoset            | 95     |
| Hg19, bonobo, gibbon, rhesus                           | chimpanzee, gorilla, orangutan, marmoset         | 93     |
| <b>3 primates differ</b>                               |                                                  |        |
| Hg19, chimpanzee, bonobo, gorilla, orangutan           | gibbon, rhesus, marmoset                         | 133428 |
| Hg19, orangutan, gibbon, rhesus, marmoset              | chimpanzee, bonobo, gorilla                      | 12983  |
| Hg19, gorilla, orangutan, gibbon, rhesus               | chimpanzee, bonobo, marmoset                     | 8204   |
| Hg19, gorilla, gibbon, rhesus, marmoset                | chimpanzee, bonobo, orangutan                    | 2891   |
| Hg19, chimpanzee, gorilla, orangutan, gibbon           | bonobo, rhesus, marmoset                         | 2284   |
| Hg19, bonobo, gorilla, orangutan, gibbon               | chimpanzee, rhesus, marmoset                     | 730    |
| Hg19, chimpanzee, orangutan, gibbon, rhesus            | bonobo, gorilla, marmoset                        | 373    |
| Hg19, chimpanzee, gibbon, rhesus, marmoset             | bonobo, gorilla, orangutan                       | 282    |
| Hg19, bonobo, orangutan, gibbon, rhesus                | chimpanzee, gorilla, marmoset                    | 236    |
| Hg19, bonobo, gibbon, rhesus, marmoset                 | chimpanzee, gorilla, orangutan                   | 204    |
| <b>2 primates differ</b>                               |                                                  |        |
| Hg19, chimpanzee, bonobo, gorilla, orangutan, gibbon   | rhesus, marmoset                                 | 559086 |
| Hg19, gorilla, orangutan, gibbon, rhesus, marmoset     | chimpanzee, bonobo                               | 219505 |
| Hg19, chimpanzee, bonobo, gorilla, orangutan, rhesus   | gibbon, marmoset                                 | 42798  |
| Hg19, chimpanzee, bonobo, gorilla, orangutan, marmoset | gibbon, rhesus                                   | 36744  |
| Hg19, chimpanzee, bonobo, gorilla, rhesus, marmoset    | orangutan, gibbon                                | 35622  |
| Hg19, chimpanzee, bonobo, gorilla, gibbon, rhesus      | orangutan, marmoset                              | 30163  |
| Hg19, chimpanzee, bonobo, gorilla, gibbon, marmoset    | orangutan, rhesus                                | 21136  |
| Hg19, chimpanzee, orangutan, gibbon, rhesus, marmoset  | bonobo, gorilla                                  | 12983  |

|                                                                |                       |         |
|----------------------------------------------------------------|-----------------------|---------|
| Hg19, chimpanzee, gorilla, orangutan, gibbon, rhesus           | bonobo, marmoset      | 8204    |
| Hg19, chimpanzee, bonobo, gibbon, rhesus, marmoset             | gorilla, orangutan    | 5934    |
| Hg19, chimpanzee, bonobo, orangutan, gibbon, rhesus            | gorilla, marmoset     | 5689    |
| Hg19, bonobo, gorilla, orangutan, gibbon, rhesus               | chimpanzee, marmoset  | 4872    |
| Hg19, chimpanzee, gorilla, orangutan, gibbon, marmoset         | bonobo, rhesus        | 4137    |
| Hg19, chimpanzee, gorilla, orangutan, rhesus, marmoset         | bonobo, gibbon        | 3043    |
| Hg19, chimpanzee, gorilla, gibbon, rhesus, marmoset            | bonobo, orangutan     | 2761    |
| Hg19, chimpanzee, bonobo, orangutan, gibbon, marmoset          | gorilla, rhesus       | 2430    |
| Hg19, bonobo, gorilla, orangutan, gibbon, marmoset             | chimpanzee, rhesus    | 2082    |
| Hg19, chimpanzee, bonobo, orangutan, rhesus, marmoset          | gorilla, gibbon       | 1989    |
| Hg19, bonobo, orangutan, gibbon, rhesus, marmoset              | chimpanzee, gorilla   | 1981    |
| Hg19, bonobo, gorilla, orangutan, rhesus, marmoset             | chimpanzee, gibbon    | 1634    |
| Hg19, bonobo, gorilla, gibbon, rhesus, marmoset                | chimpanzee, orangutan | 1623    |
| <b>1 primate differs</b>                                       |                       |         |
| Hg19, chimpanzee, bonobo, gorilla, orangutan, gibbon, rhesus   | marmoset              | 7370356 |
| Hg19, chimpanzee, bonobo, gorilla, orangutan, gibbon, marmoset | rhesus                | 2637782 |
| Hg19, chimpanzee, bonobo, gorilla, orangutan, gibbon, marmoset | gibbon                | 1437746 |
| Hg19, chimpanzee, bonobo, gorilla, gibbon, rhesus, marmoset    | orangutan             | 1656095 |
| Hg19, chimpanzee, bonobo, orangutan, gibbon, rhesus, marmoset  | gorilla               | 501071  |
| Hg19, chimpanzee, gorilla, orangutan, gibbon, rhesus, marmoset | bonobo                | 202408  |
| Hg19, bonobo, gorilla, orangutan, gibbon, rhesus, marmoset     | chimpanzee            | 170578  |

**Table S7: Counts of indels where some or all primate outgroups carry an identical non-human allele**

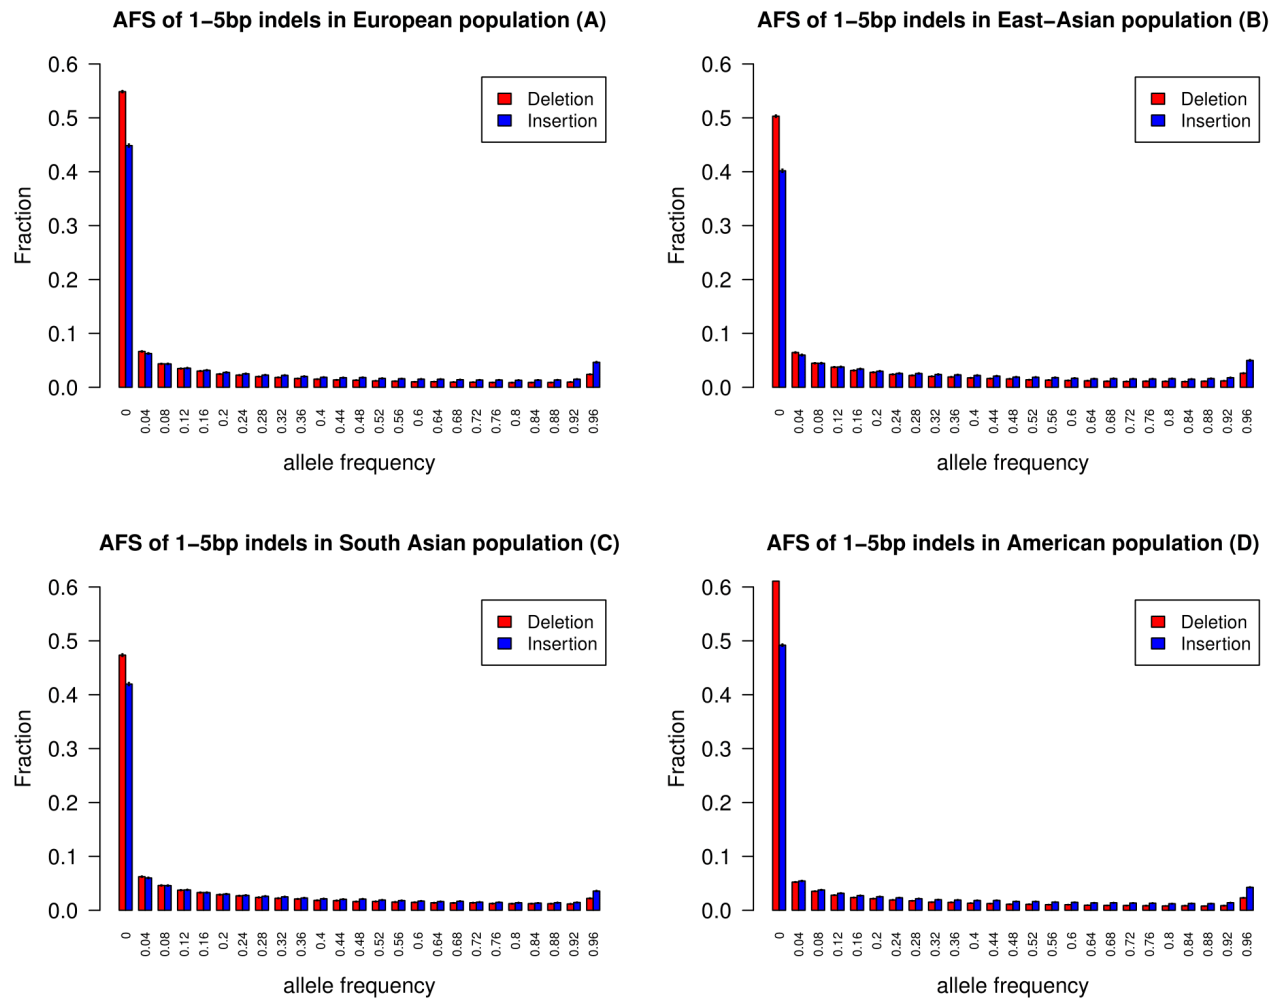

**Figure S1: Site frequency spectra (SFS) of human lineage indels in non-African populations: A) European population B) East-Asian population C) South Asian population D) American population for different lengths of indels (1-5bp). All frequency distributions show significant differences (Wilcoxon rank sum test, two-sided: all p-values  $<2.3e-16$ ; FDR-adjusted p-values  $<2.2e-16$ ).**



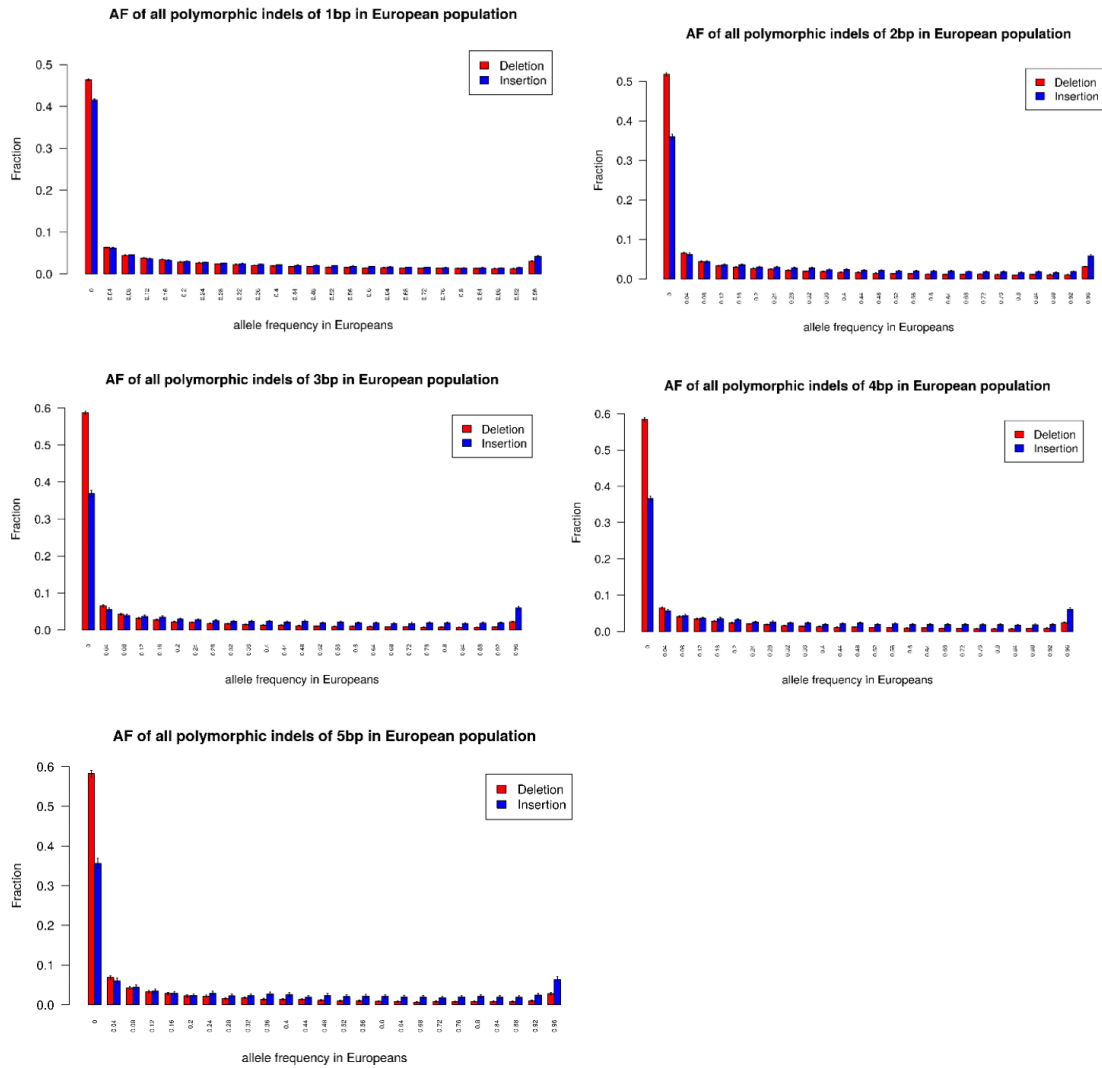

**Figure S2: Site frequency spectra (SFS) of human lineage indels in the European population for different lengths of indels (1-5bp). All frequency distributions show significant differences (Wilcoxon rank sum test, two-sided: all p-values  $<2.3e-16$ ; FDR-adjusted p-values  $<2.2e-16$ ).**

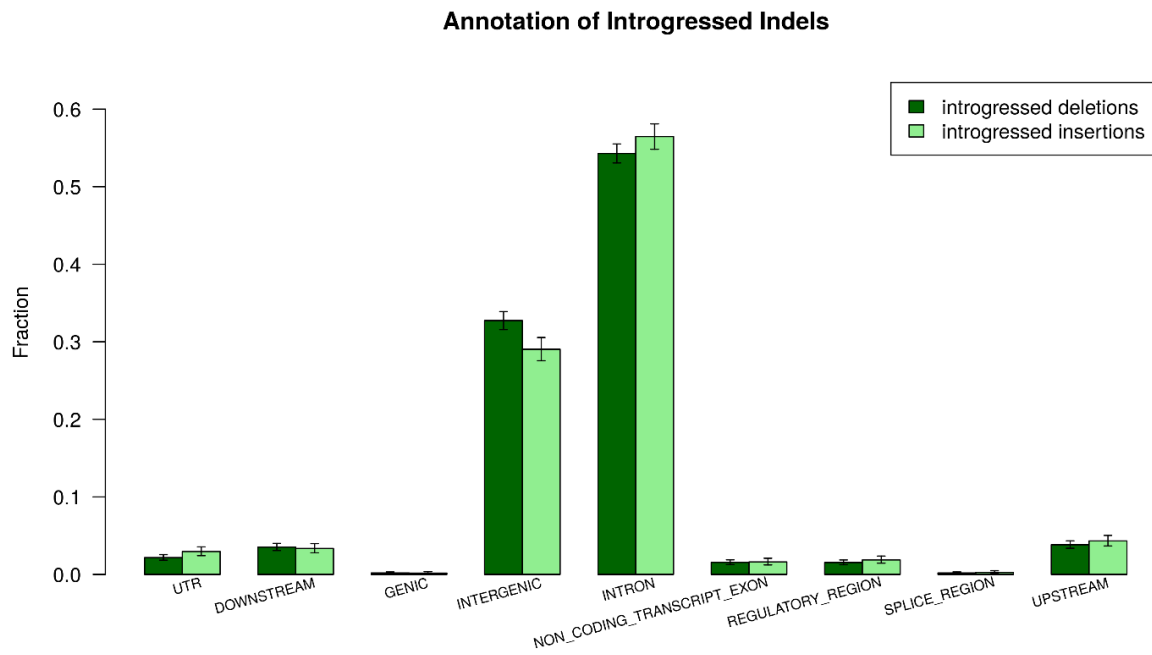

**Figure S3: Relative frequency of variant effect predictor annotation of introgressed deletions (dark green) and introgressed insertions (light green).**

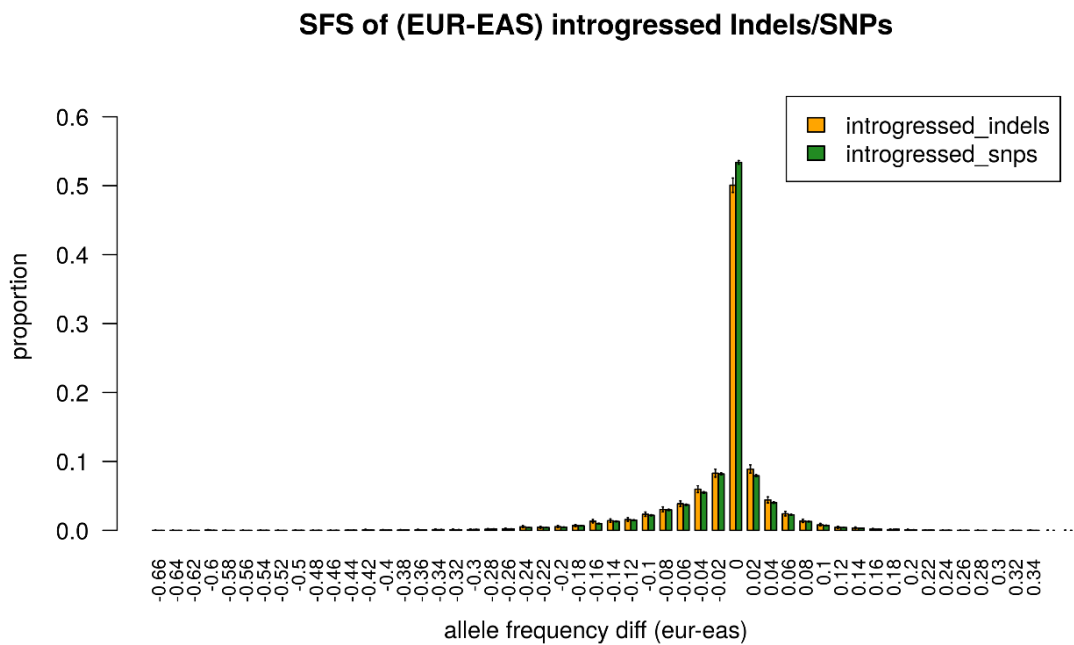

**Figure S4: Histogram comparing the European to East-Asian allele frequency differences between indels and SNPs.**
